# Supplementary material for: Influence of Pore Structure Characteristics on Grain Bulk Modulus in Underground Rock Masses: A Hydro-Mechanical Experimental and Theoretical Evaluation
Source: Research Square preprint supplement (doi:10.21203/rs.3.rs-8526494/v1), 2026-01-14
Supplement: Supplementary file 1 [file 8b1e6ca8fe5f518c0fa85dea.docx]

**Highlights**

1. Grain bulk modulus is overestimated when pore structure effects are ignored.
2. X-ray CT reveals that isolated pores induce grain deformation, reducing bulk modulus.
3. Mineral-based theoretical models have limitations in capturing pore-induced effects.
4. A pore-structure-based correlation improves grain bulk modulus prediction accuracy.
